# Supplementary material
Source: PubMed Central journal article supplement (PMC8730528)
Supplement: mmc1.pdf [file mmc1.pdf]

**Cancer Cell, Volume 40**

**Supplemental information**

**Neutralization breadth of SARS-CoV-2 viral  
variants following primary series and booster  
SARS-CoV-2 vaccines in patients with cancer**

**Vivek Naranbhai, Kerri J. St. Denis, Evan C. Lam, Onosereme Ofoman, Wilfredo F. Garcia-Beltran, Cristhian B. Mairena, Atul K. Bhan, Justin F. Gainor, Alejandro B. Balazs, A. John Iafrate, and on behalf of the CANVAX team**

## Supplemental Information

Figure S1: Concentration of antibodies against SARS-CoV-2 spike protein receptor binding domain (RBD) of a) IgA/M/G total, b) IgA, c) IgG and d) IgM isotypes. Related to Figure 1.

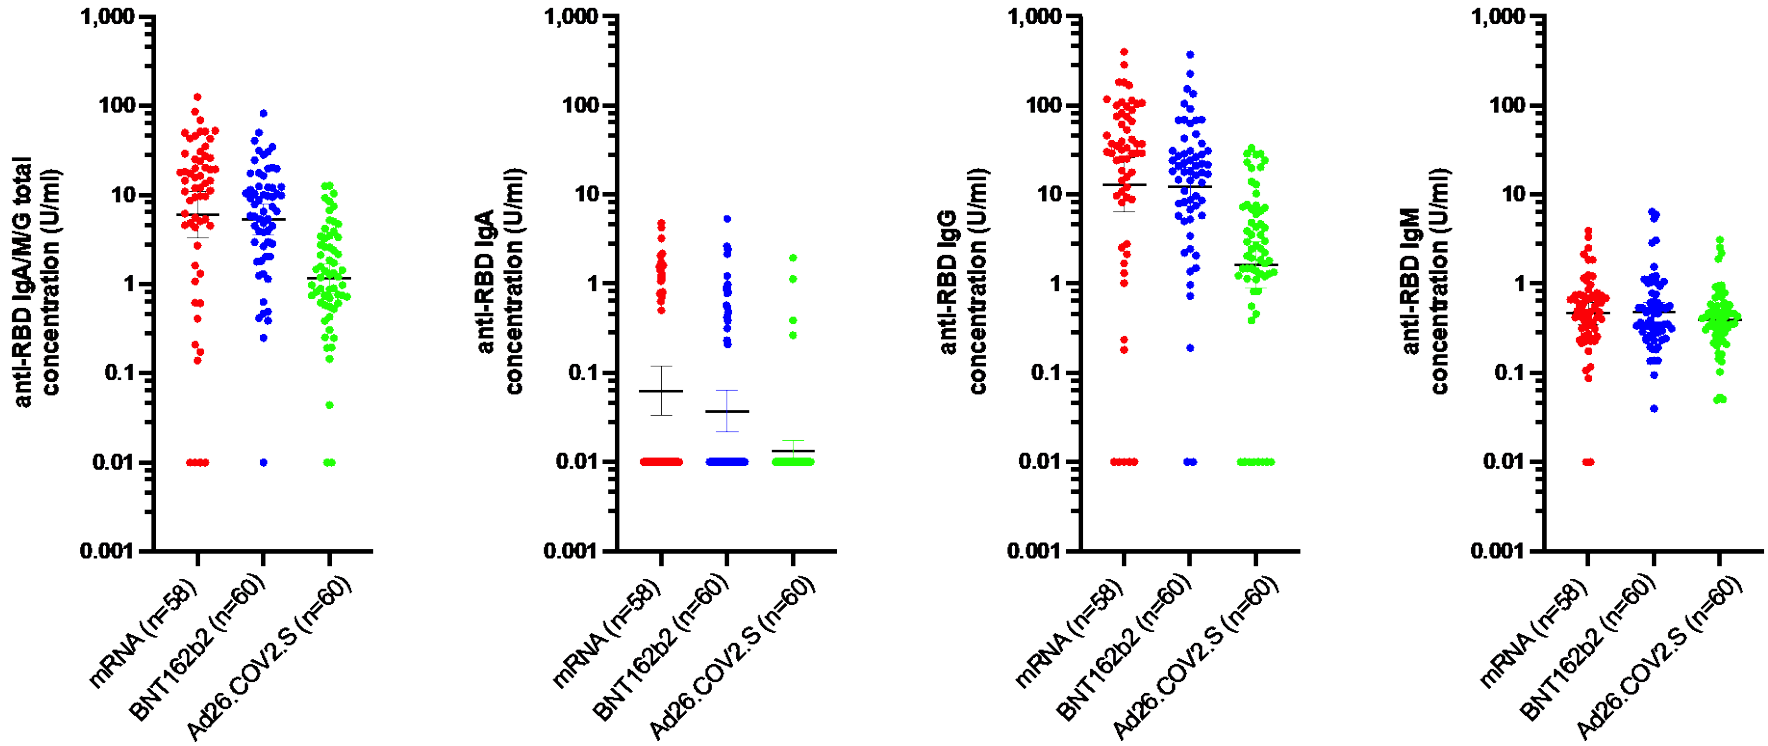

**Figure S2: Correlation between neutralization of wildtype SARS-CoV-2 pseudovirus and A) anti-spike or B) anti-RBD antibody concentration. Related to Figure 1.**

**A)**

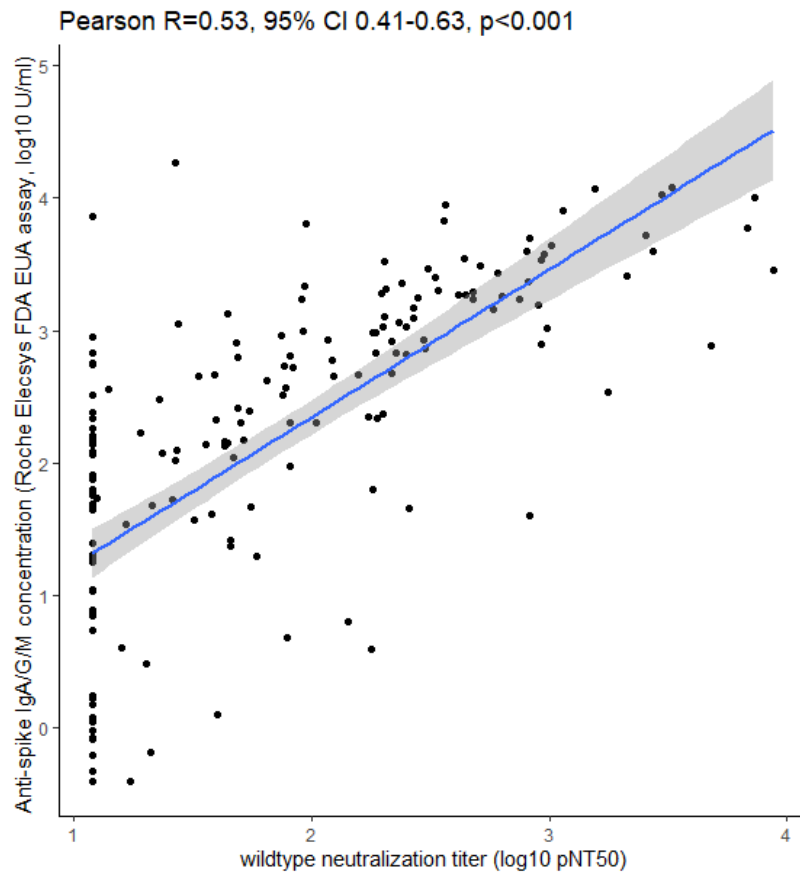

**B)**

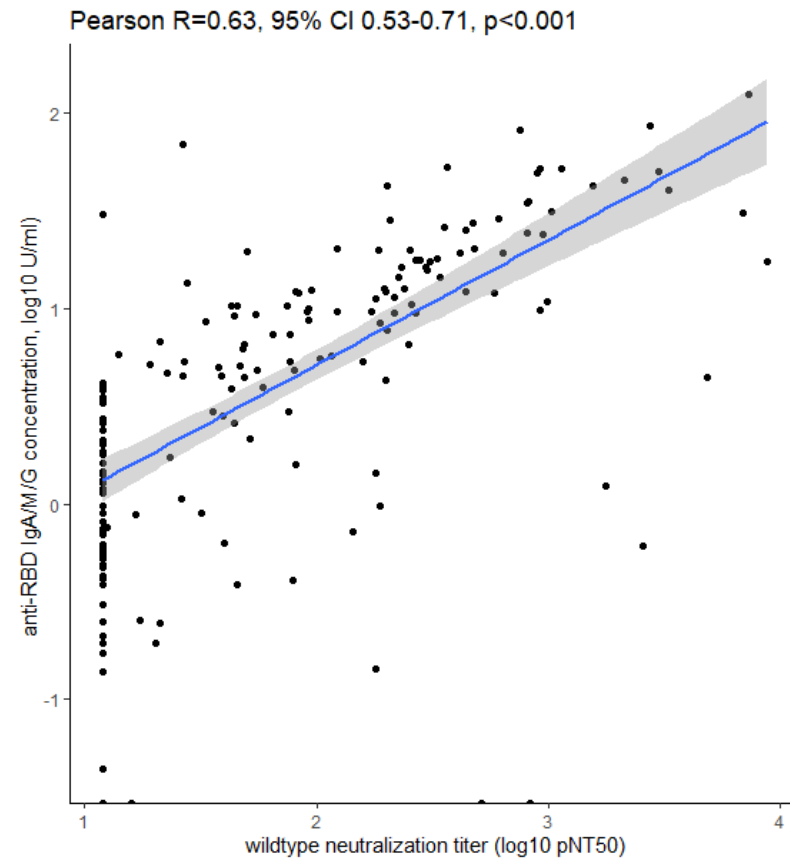

**Figure S3: Association between anti-spike IgA/G/M concentration (Roche Elecsys assay) and neutralization breadth.** Related to Table 2. Variant neutralization was defined as neutralization >20 for each variant. A horizontal line is drawn at an antibody concentration of  $3\log_{10}$  (1000 U/mL), which corresponds to a positive predictive value (PPV) of 90% for >2 variants neutralized.

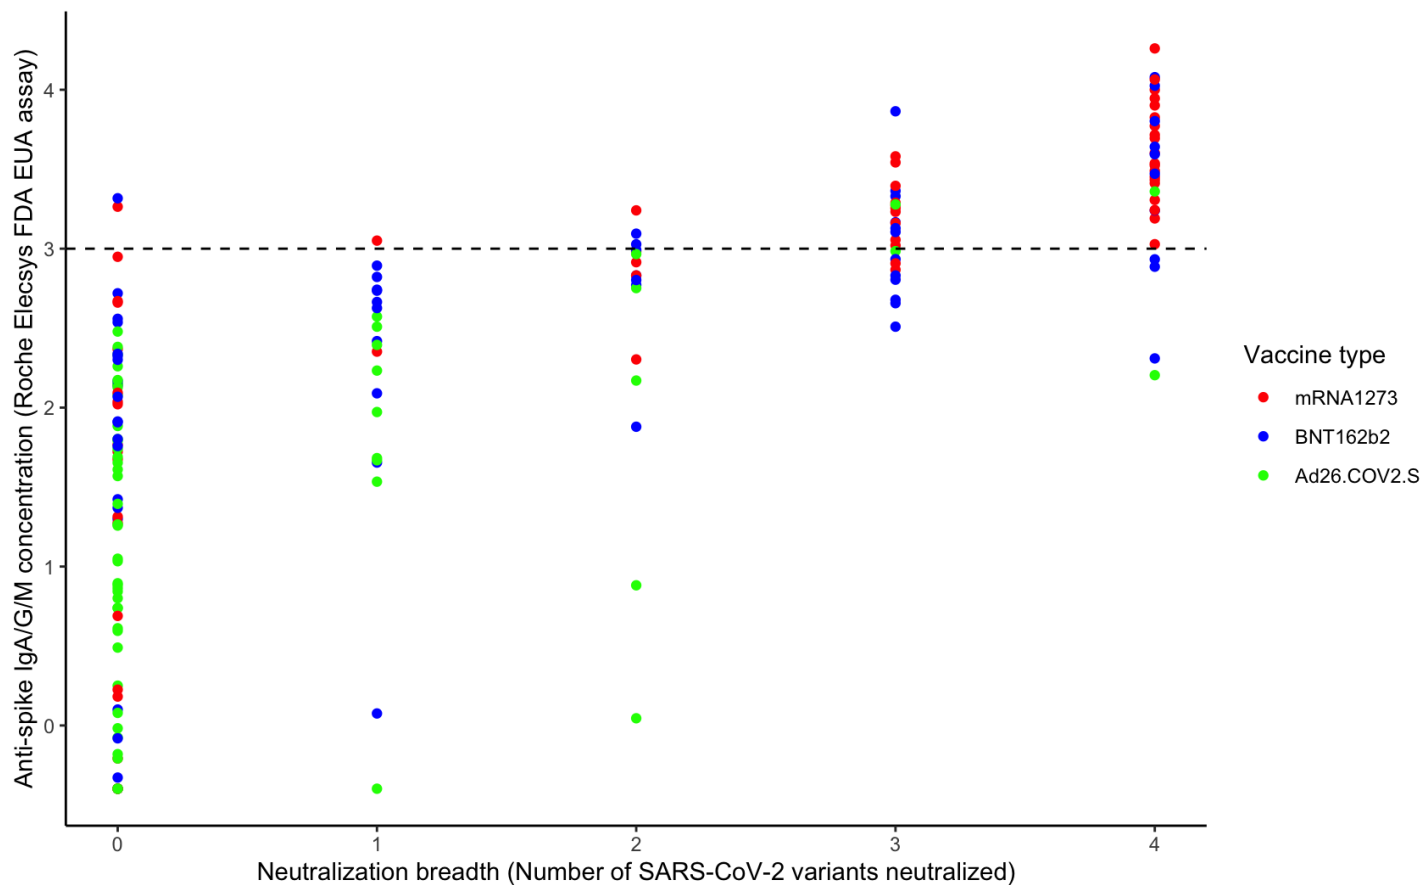

**Table S1: Summary of mutations in SARS CoV-2 strains used in this study. Related to STAR Methods, Figure 1 and Figure 2.**

| Strain/Mutation     | L18F | T19R | T20N | P26S | delH69-V70 | D80A | D138Y | G142D | delY145 | delE156- | R190S | D215G | delL242-L244 | K417N | K417T | L452R | T478K | E484K | E484Q | N501Y | A570D | D614G | H655Y | P681H | P681R | A701V | T716I | D950N | S982A | T1027I | D1118H | V1176F | delF1256-T1273 |   |   |  |
|---------------------|------|------|------|------|------------|------|-------|-------|---------|----------|-------|-------|--------------|-------|-------|-------|-------|-------|-------|-------|-------|-------|-------|-------|-------|-------|-------|-------|-------|--------|--------|--------|----------------|---|---|--|
| <b>Wildtype</b>     |      |      |      |      |            |      |       |       |         |          |       |       |              |       |       |       |       |       |       |       |       |       |       |       |       |       |       |       |       |        |        |        |                |   | + |  |
| <b>Alpha</b>        |      |      |      |      |            |      |       |       |         |          |       |       |              |       |       |       |       |       |       |       |       |       |       |       |       |       |       |       |       |        |        |        |                |   |   |  |
| <b>B.1.1.7</b>      |      |      |      |      | +          |      |       |       | +       |          |       |       |              |       |       |       |       |       |       |       | +     | +     | +     |       | +     |       |       | +     |       | +      |        |        | +              |   | + |  |
| <b>Beta</b>         |      |      |      |      |            |      |       |       |         |          |       |       |              |       |       |       |       |       |       |       |       |       |       |       |       |       |       |       |       |        |        |        |                |   |   |  |
| <b>B.1.351 v1</b>   |      |      |      |      |            | +    |       |       |         |          |       | +     | +            | +     |       |       |       | +     |       | +     |       | +     |       |       |       | +     |       |       |       |        |        |        |                |   | + |  |
| <b>Gamma</b>        |      |      |      |      |            |      |       |       |         |          |       |       |              |       |       |       |       |       |       |       |       |       |       |       |       |       |       |       |       |        |        |        |                |   |   |  |
| <b>P.1</b>          | +    |      | +    | +    |            |      | +     |       |         |          | +     |       |              |       | +     |       |       | +     |       | +     |       | +     | +     |       |       |       |       |       |       |        | +      |        | +              | + |   |  |
| <b>Delta</b>        |      |      |      |      |            |      |       |       |         |          |       |       |              |       |       |       |       |       |       |       |       |       |       |       |       |       |       |       |       |        |        |        |                |   |   |  |
| <b>B.1.617.2 v1</b> |      | +    |      |      |            |      |       | +     |         | +        |       |       |              |       |       | +     | +     |       |       |       |       |       | +     |       |       | +     |       |       | +     |        |        |        |                |   | + |  |

**Table S2: Correlates of neutralization of viral variants in patients with cancer.** Shown are results of multivariate regression model including the covariates shown, with log10 pseudovirus neutralization of each viral variant as the response variable. Related to Figure 1.

| Characteristic                    | Wildtype |              |         | Alpha |              |         | Beta  |              |         | Gamma |              |         | Delta |              |         |
|-----------------------------------|----------|--------------|---------|-------|--------------|---------|-------|--------------|---------|-------|--------------|---------|-------|--------------|---------|
|                                   | Beta     | 95% CI       | p-value | Beta  | 95% CI       | p-value | Beta  | 95% CI       | p-value | Beta  | 95% CI       | p-value | Beta  | 95% CI       | p-value |
| <b>Age</b>                        | -0.07    | -0.12, -0.03 | 0.002   | -0.09 | -0.13, -0.04 | <0.001  | -0.02 | -0.05, 0.00  | 0.061   | -0.07 | -0.11, -0.02 | 0.003   | -0.04 | -0.09, 0.00  | 0.059   |
| <b>Vaccine type</b>               |          |              |         |       |              |         |       |              |         |       |              |         |       |              |         |
| mRNA1273                          |          | Ref          |         |       | Ref          |         |       | Ref          |         |       | Ref          |         |       | Ref          |         |
| BNT162b2                          | 0.38     | -0.62, -0.15 | 0.002   | 0.33  | -0.55, -0.10 | 0.005   | 0.08  | -0.21, 0.04  | 0.2     | 0.39  | -0.61, -0.16 | <0.001  | 0.34  | -0.57, -0.11 | 0.003   |
| Ad26.COV2.S                       | 0.89     | -1.1, -0.65  | <0.001  | -0.6  | -0.84, -0.37 | <0.001  | 0.16  | -0.29, -0.03 | 0.013   | -0.6  | -0.84, -0.37 | <0.001  | 0.64  | -0.87, -0.40 | <0.001  |
| <b>Chemotherapy</b>               | 0.28     | -0.49, -0.07 | 0.008   | 0.31  | -0.51, -0.11 | 0.002   | 0.11  | -0.22, -0.01 | 0.04    | 0.26  | -0.45, -0.06 | 0.012   | 0.12  | -0.32, 0.07  | 0.2     |
| <b>Immunotherapy</b>              | 0.08     | -0.20, 0.35  | 0.6     | 0.02  | -0.24, 0.28  | 0.9     | 0.06  | -0.08, 0.20  | 0.4     | 0.04  | -0.21, 0.30  | 0.7     | 0.04  | -0.22, 0.30  | 0.8     |
| <b>Time after 1st dose (days)</b> | 0        | -0.03, 0.02  | 0.7     | 0.01  | -0.01, 0.04  | 0.2     | 0.01  | 0.00, 0.02   | 0.081   | 0.01  | -0.02, 0.03  | 0.5     | 0     | -0.03, 0.02  | 0.8     |
| <b>Cancer type</b>                |          |              |         |       |              |         |       |              |         |       |              |         |       |              |         |
| Solid                             |          | Ref          |         |       | Ref          |         |       | Ref          |         |       | Ref          |         |       | Ref          |         |
| BMT                               | 0.02     | -0.28, 0.32  | >0.9    | 0.22  | -0.06, 0.51  | 0.13    | 0.17  | 0.02, 0.33   | 0.031   | 0.18  | -0.11, 0.46  | 0.2     | 0.16  | -0.13, 0.45  | 0.3     |
| Heme                              | 0.15     | -0.51, 0.21  | 0.4     | 0.01  | -0.36, 0.33  | >0.9    | 0.02  | -0.21, 0.17  | 0.8     | 0.03  | -0.32, 0.38  | 0.9     | 0.11  | -0.45, 0.24  | 0.5     |

**Table S3: Characteristics of patients who received booster vaccine doses. Related to Figure 2.**

|    | <b>Cancer type, therapy</b>                                                          | <b>Initial Vaccine series</b> | <b>Additional vaccine dose type</b> | <b>Interval between initial and additional dose (days)</b> |
|----|--------------------------------------------------------------------------------------|-------------------------------|-------------------------------------|------------------------------------------------------------|
| 1  | Cutaneous Squamous Cell Carcinoma on immunotherapy                                   | Ad26.COV2.S                   | BTN162b2                            | 50                                                         |
| 2  | Breast cancer previously on chemotherapy                                             | Ad26.COV2.S                   | BTN162b2                            | 81                                                         |
| 3  | Breast cancer and marginal zone lymphoma on lenalidomide (no B-cell depleting agent) | Ad26.COV2.S                   | BTN162b2                            | 81                                                         |
| 4  | Oral squamous cell cancer receiving targeted therapy and steroids                    | Ad26.COV2.S                   | BTN162b2                            | 104                                                        |
| 5  | Lung cancer on immunotherapy and steroids                                            | Ad26.COV2.S                   | mRNA1273                            | 86                                                         |
| 6  | Breast cancer on active chemotherapy                                                 | mRNA1273                      | BTN162b2                            | 96                                                         |
| 7  | Bone marrow transplanted on immunosuppression                                        | mRNA1273                      | mRNA1273                            | 79                                                         |
| 8  | Lung cancer, on chemotherapy and steroids                                            | mRNA1273                      | mRNA1273                            | 115                                                        |
| 9  | oral squamous cell cancer receiving chemotherapy, immunotherapy and steroids         | BTN162b2                      | BTN162b2                            | 73                                                         |
| 10 | lung cancer (early stage) receiving chemoradiation                                   | BTN162b2                      | BTN162b2                            | 80                                                         |
| 11 | Breast cancer on targeted therapy                                                    | BTN162b2                      | BTN162b2                            | 108                                                        |
| 12 | Oral squamous cell cancer receiving chemoradiation                                   | BTN162b2                      | mRNA1273                            | 78                                                         |
| 13 | Pancreatic cancer receiving chemotherapy                                             | BTN162b2                      | mRNA1273                            | 88                                                         |

## Code

### **#Analysis of variant neutralization for Naranbhai et al., Cancer Cell 2021**

#### **#compute and analyze neutralization breadth and number of measurable isotype antibodies against RBD**

```
breadththreshold=20 #pNT50 threshold of 20 from Garcia-Beltran Cell 2021
```

```
var$breadth=ifelse(var$Alpha>breadththreshold,1,0)+ifelse(var$Beta.v1>breadththreshold,1,0)+ifelse(var$Gamma>breadththreshold,1,0)+ifelse(var$Delta>breadththreshold,1,0)
```

```
isothreshold=0
```

```
var$isotypeswitch=ifelse(var$RBD.IgA>isothreshold,1,0)+ifelse(var$RBD.IgM>isothreshold,1,0)+ifelse(var$RBD.IgG>isothreshold,1,0)
```

```
table(var$isotypeswitch, var$covid_vaccine_brand.factor)
```

#### **#Table 2**

```
tbl_regression(lm(breadth~log10(pNT50_WT)+l(Age/5)+covid_vaccine_brand.factor+Chemotherapy+Immunotherapy+l(SampleDayspost1stdose/7)+strata(cancergroup), var[which(!var$Group=="Post boost"),]) %>%
```

```
add_n()
```

#### **#Fig S3 how well does spike binding titer predict breadth**

```
cols <- c("Moderna" = "red", "Pfizer" = "blue", "Johnson & Johnson/ Janssen" = "green")
```

```
ggplot(var[which(!var$Group=="Post boost"),], aes(x=breadth, y=log10(Spike.resultnum)))+geom_point(aes(color=covid_vaccine_brand.factor))+theme_classic()+ylab("Anti-spike IgA/G/M concentration (Roche Elecsys FDA EUA assay)")+xlab("Neutralization breadth (Number of SARS-CoV-2 variants neutralized)")+guides(color=guide_legend(title="Vaccine type"))+geom_hline(yintercept=3, lty=2)+ scale_colour_manual(values = cols, labels = c("mRNA1273", "BNT162b2", "Ad26.COV2.S"))
```

```
#Calculate PPV
```

```
library("epiR")
```

```
epi.tests(table(var$Spike.resultnum[which(!var$Group=="Post boost")>1000,var$breadth[which(!var$Group=="Post boost")>2])
```
